# Supplementary material
Source: MDPI journal article supplement (https://www.mdpi.com/2075-4655/6/4/36)
Supplement: s1 [file s1]

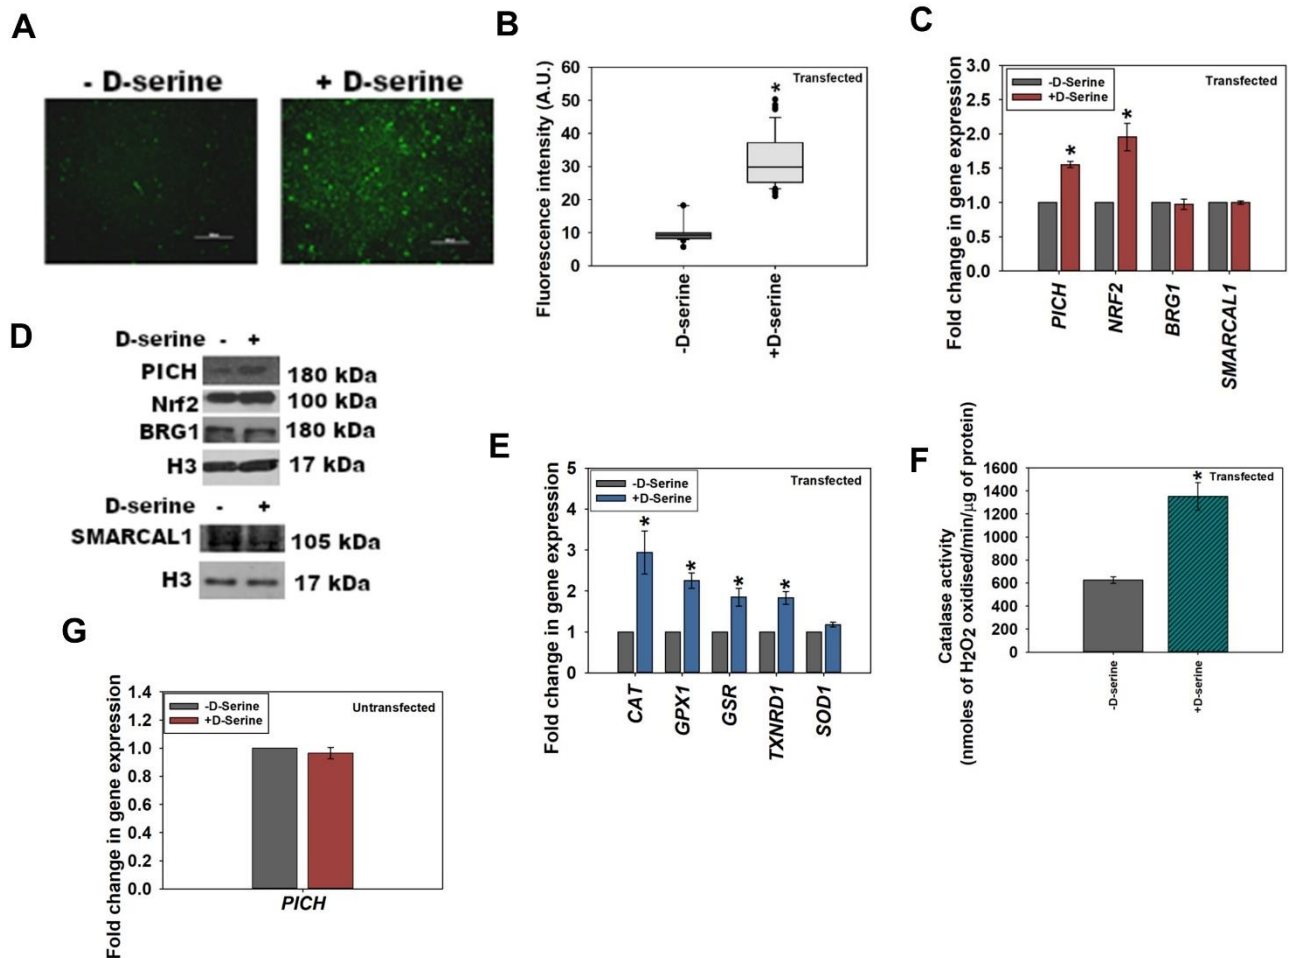

**Supplementary Figure S1. *PICH* expression is upregulated when cells are exposed to oxidative stress.** (A). Cellular ROS levels were measured using DCFDA in DAAO transfected HeLa cells in the absence and presence of D-serine. (B). Quantitation of the fluorescence intensity. (C). Expression of *PICH*, *Nrf2*, *BRG1*, and *SMARCAL1* was analyzed by qRT-PCR. (D). Expression of *PICH*, *Nrf2*, *BRG1*, and *SMARCAL1* was analyzed by western blot using H3 as control. (E). Expression of *CAT*, *GPX1*, *GSR*, *TXNRD1*, and *SOD1* was analyzed by qRT-PCR. (F). Catalase activity ( $\mu\text{mol}/\text{min}$ ) was examined in the absence and presence of D-serine treatment in DAAO transfected HeLa cells. (G). Expression of *PICH* was analyzed by qRT-PCR in untransfected HeLa cells after treatment with 25mM D-Serine for 10 min. . In these experiments, DAAO transfected cells were treated with 25 mM D-serine for 10 min to induce ROS production. *GAPDH* was used as the internal control in the qRT-PCR experiments. The qRT-PCR experiments are presented as average  $\pm$  SEM of three independent experiments. The western blots are presented as average  $\pm$  SEM of three independent experiments. The catalase activity is presented as average  $\pm$  SEM of three independent experiments.

**A**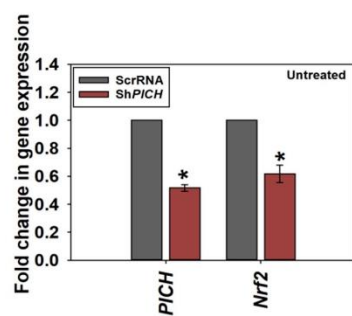**B**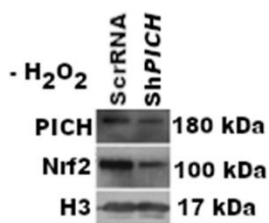**C**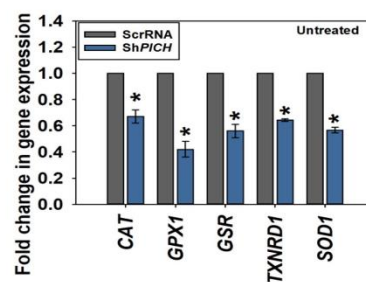**D**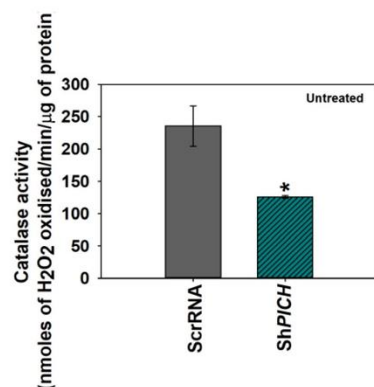**E**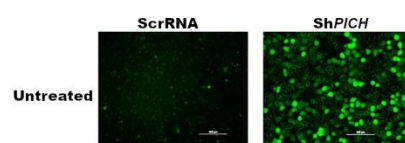**F**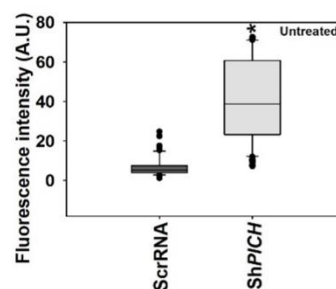**G**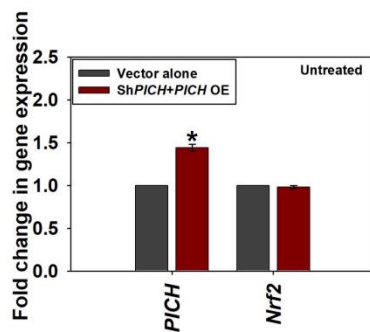**H**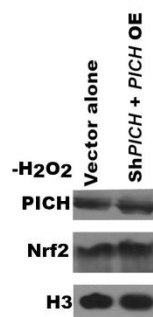**I**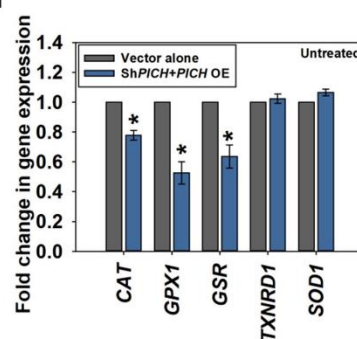**J**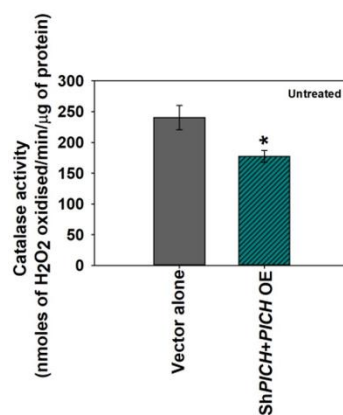

**Supplementary Figure S2. PICH regulates the expression of *Nrf2* in HeLa cells in the absence and presence of oxidative stress.** (A). Expression of *PICH* and *Nrf2* in HeLa cells transfected with either ScrRNA or with Sh*PICH* plasmid in HeLa cells in the absence of H<sub>2</sub>O<sub>2</sub> treatment (P-value = 3E-10 for Sh*PICH*). (B). Expression of *PICH* and *Nrf2* in untreated HeLa cells transfected with either ScrRNA or with Sh*PICH* was analyzed by western blot. (C). Expression of antioxidant genes *CAT*, *GPX1*, *GSR*, *TXNRD1*, and *SOD1* were quantitated by qRT-PCR in untreated HeLa cells transfected either with ScrRNA or with Sh*PICH*. (D). Catalase activity ( $\mu\text{mol}/\text{min}$ ) was quantitated in untreated HeLa cells transfected either with ScrRNA or with Sh*PICH*. (E). Cellular ROS was analyzed using DCFDA in HeLa cells transfected with either ScrRNA or with Sh*PICH* plasmid. (F). Fluorescent intensity was quantitated using the software provided by TiE, Nikon Microscope. (G). Transcript levels of *PICH* and *Nrf2* were quantitated by qRT-PCR in untreated HeLa cells transfected with ScrRNA and empty vector or with the Sh*PICH* and *PICH* overexpression construct. (H). Expression of *PICH* and *Nrf2* in untreated HeLa cells transfected with ScrRNA and empty vector or with the Sh*PICH* and *PICH* overexpression construct was analyzed by western blot. (I). Expression of antioxidant genes *CAT*, *GPX1*, *GSR*, *TXNRD1*, and *SOD1*, were quantitated in untreated HeLa cells transfected with ScrRNA and empty vector or with the Sh*PICH* and *PICH* overexpression construct. (J). Catalase activity ( $\mu\text{mol}/\text{min}$ ) was estimated in untreated HeLa cells transfected with ScrRNA and empty vector or with the Sh*PICH* and *PICH* overexpression construct. *GAPDH* was used as the internal control in the qRT-PCR experiments. The qRT-PCR experiments are presented as average  $\pm$  SEM of three independent experiments. The western blots are presented as average  $\pm$  SEM of three independent experiments. The catalase activity is presented as average  $\pm$  SEM of three independent experiments.

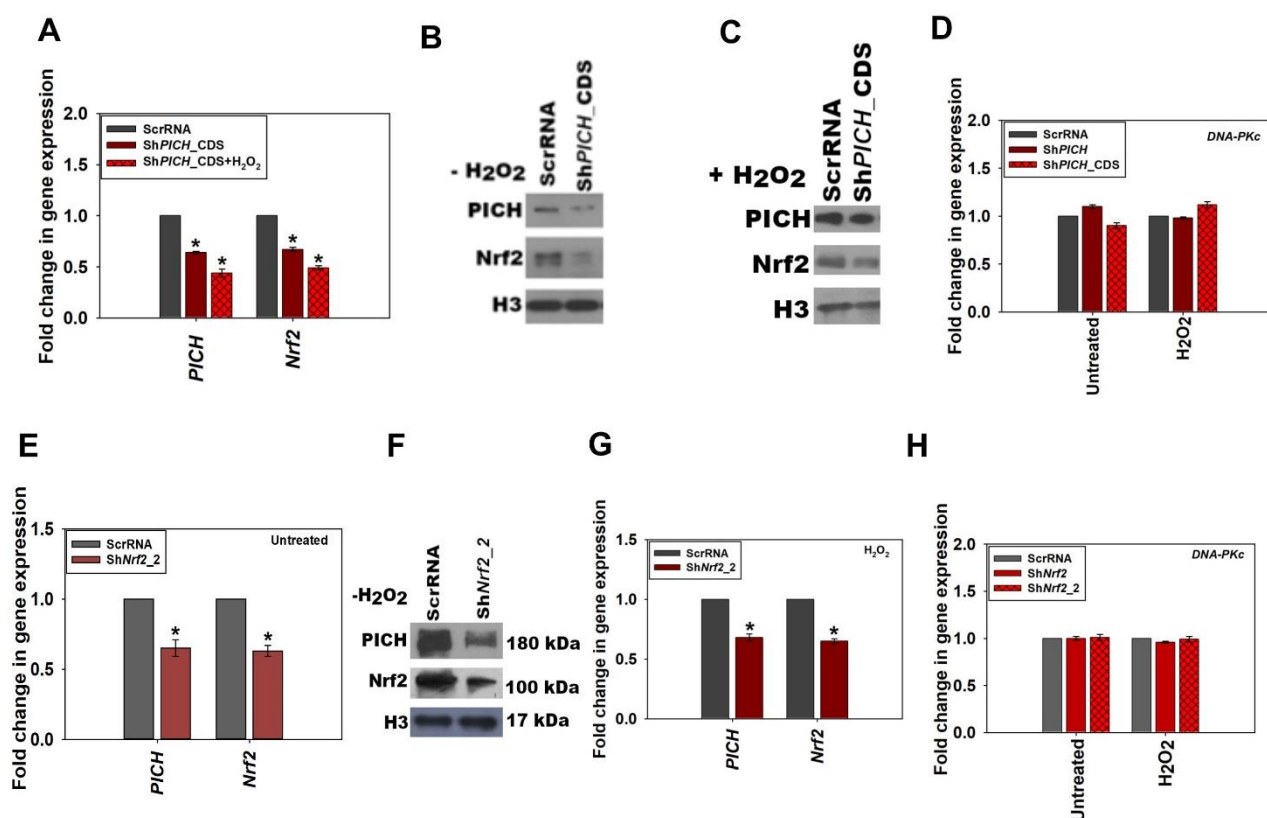

**Supplementary Figure S3. *ShPICH\_2* regulates the expression of *Nrf2* in HeLa cells in the absence and presence of oxidative stress.** (A). Expression of *PICH* and *Nrf2* in HeLa cells transfected with either ScrRNA or with *ShPICH\_CDS* plasmid in HeLa cells in the absence and in presence of H<sub>2</sub>O<sub>2</sub> treatment. (B). Expression of *PICH* and *Nrf2* in untreated HeLa cells transfected with either ScrRNA or with *ShPICH\_CDS* was analyzed by western blot. (C). Expression of *PICH* and *Nrf2* in treated HeLa cells transfected with either ScrRNA or with *ShPICH\_CDS* was analyzed by western blot (D). Expression of *DNA-PKc* in untreated and in treated (100  $\mu$ M H<sub>2</sub>O<sub>2</sub>; 20 min) HeLa cells transfected either with ScrRNA or with *ShPICH* and *ShPICH\_CDS* construct. (E). Expression of *PICH*, *Nrf2* in untreated HeLa cells transfected either with ScrRNA or with *ShNrf2\_2* construct. (F). Expression of *PICH* and *Nrf2* in untreated HeLa cells transfected with either ScrRNA or with *ShNrf2\_2* was analyzed by western blot. (G). Expression of *PICH*, *Nrf2* in treated (100  $\mu$ M H<sub>2</sub>O<sub>2</sub>; 20 min) transfected either with ScrRNA or with *ShNrf2\_2*. (H). Expression of *DNA-PKc* in untreated and in treated (100  $\mu$ M H<sub>2</sub>O<sub>2</sub>; 20 min) HeLa cells transfected either with ScrRNA or with *ShNrf2* and *ShNrf2\_2* construct.

*GAPDH* was used as the internal control in the qRT-PCR experiments. The qRT-PCR experiments are presented as average  $\pm$  SEM of three independent experiments. The western blots are presented as average  $\pm$  SEM of two independent experiments.

| Conditions/Genes                          | <i>PICH</i> | <i>Nrf2</i> |
|-------------------------------------------|-------------|-------------|
| H <sub>2</sub> O <sub>2</sub> treated (T) | 1.65        | 4.4         |
| Sh <i>PICH</i>                            | 0.51        | 0.61        |
| Sh <i>PICH</i> + T                        | 0.74        | 0.66        |
| Sh <i>PICH</i> + <i>PICH</i> OE           | 1.44        | 0.98        |
| (Sh <i>PICH</i> + <i>PICH</i> OE)+T       | 1.2         | 1.41        |
| Sh <i>PICH</i> + <i>PIC1K128A</i>         | 0.48        | 0.6         |
| (Sh <i>PICH</i> + <i>PIC1K128A</i> )+ T   | 0.58        | 0.67        |

U Untreated  
T Treated

| Conditions/Genes                          | <i>CAT</i> | <i>GPX1</i> | <i>GSR</i> | <i>TXNRD1</i> | <i>SOD1</i> |
|-------------------------------------------|------------|-------------|------------|---------------|-------------|
| H <sub>2</sub> O <sub>2</sub> treated (T) | 2.9        | 10          | 1.12       | 5.7           | 6.2         |
| Sh <i>PICH</i>                            | 0.67       | 0.42        | 0.56       | 0.64          | 0.56        |
| Sh <i>PICH</i> + T                        | 0.71       | 0.46        | 0.72       | 0.58          | 0.71        |
| Sh <i>PICH</i> + <i>PICH</i> OE           | 0.77       | 0.52        | 0.63       | 1.02          | 1.06        |
| (Sh <i>PICH</i> + <i>PICH</i> OE)+T       | 1.03       | 1.09        | 0.96       | 1.01          | 0.99        |
| Sh <i>PICH</i> + <i>PIC1K128A</i>         | 0.64       | 0.53        | 0.74       | 0.66          | 0.6         |
| (Sh <i>PICH</i> + <i>PIC1K128A</i> )+ T   | 0.69       | 0.6         | 0.76       | 0.61          | 0.69        |

U Untreated  
T Treated

Supplementary Figure S4. Heat maps of the fold changes found in qRT-PCR analysis.

A

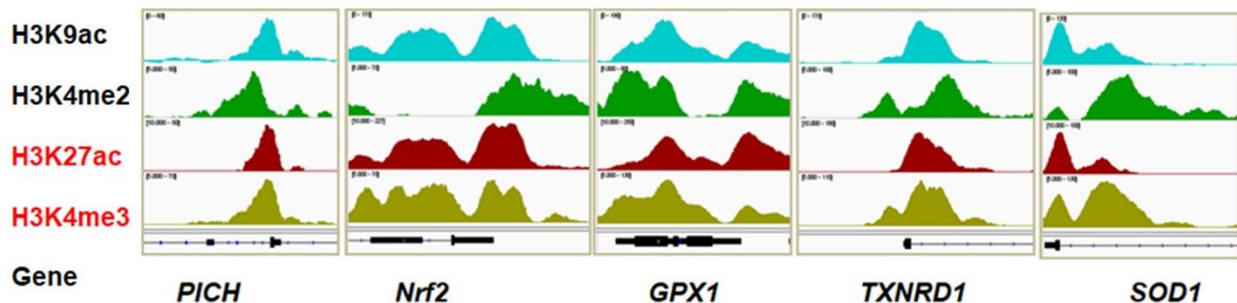

B

| Promoters     | <i>PICH</i> |      | <i>Nrf2</i> |       | RNAPII |      | H3K4me3 |      | H3K27ac |      |
|---------------|-------------|------|-------------|-------|--------|------|---------|------|---------|------|
|               | U           | T    | U           | T     | U      | T    | U       | T    | U       | T    |
| <i>PICH</i>   | 0.92        | 1.65 | 0.5         | 2.11  | 1.23   | 1.74 | 0.72    | 7.57 | 18.9    | 47.1 |
| <i>Nrf2</i>   | 7.79        | 2.8  | 8.06        | 0.9   | 0.47   | 2.63 | 0.95    | 0.85 | 0.95    | 2.72 |
| <i>GPX1</i>   | 0.54        | 6.07 | 3.14        | 8.74  | 0.9    | 2.39 | 1.29    | 3.56 | 0.83    | 1.71 |
| <i>TXNRD1</i> | 1.58        | 3.25 | 3.62        | 11.54 | 3.49   | 8.39 | 2.67    | 30.2 | 2.58    | 6.15 |
| <i>SOD1</i>   | 1.73        | 3.01 | 1.32        | 6.92  | 0.09   | 4.18 | 1.35    | 5.17 | 1.12    | 3.18 |

U Untreated  
T Treated

Supplementary Figure S5. Histone marks associated with transcription activation are enriched on *PICH*, *Nrf2*, and antioxidant gene promoters on oxidative stress. (A). ChIP-seq peaks of histone modification marks (H3K4me1, H3K4me3, H3K27ac, and H3K9c) were visualized using IGV track on the promoters of *PICH*, *Nrf2*, *GPX1*, *TXNRD1*, and *SOD1*. (B). Heat map of the fold enrichment values found in the ChIP experiments.

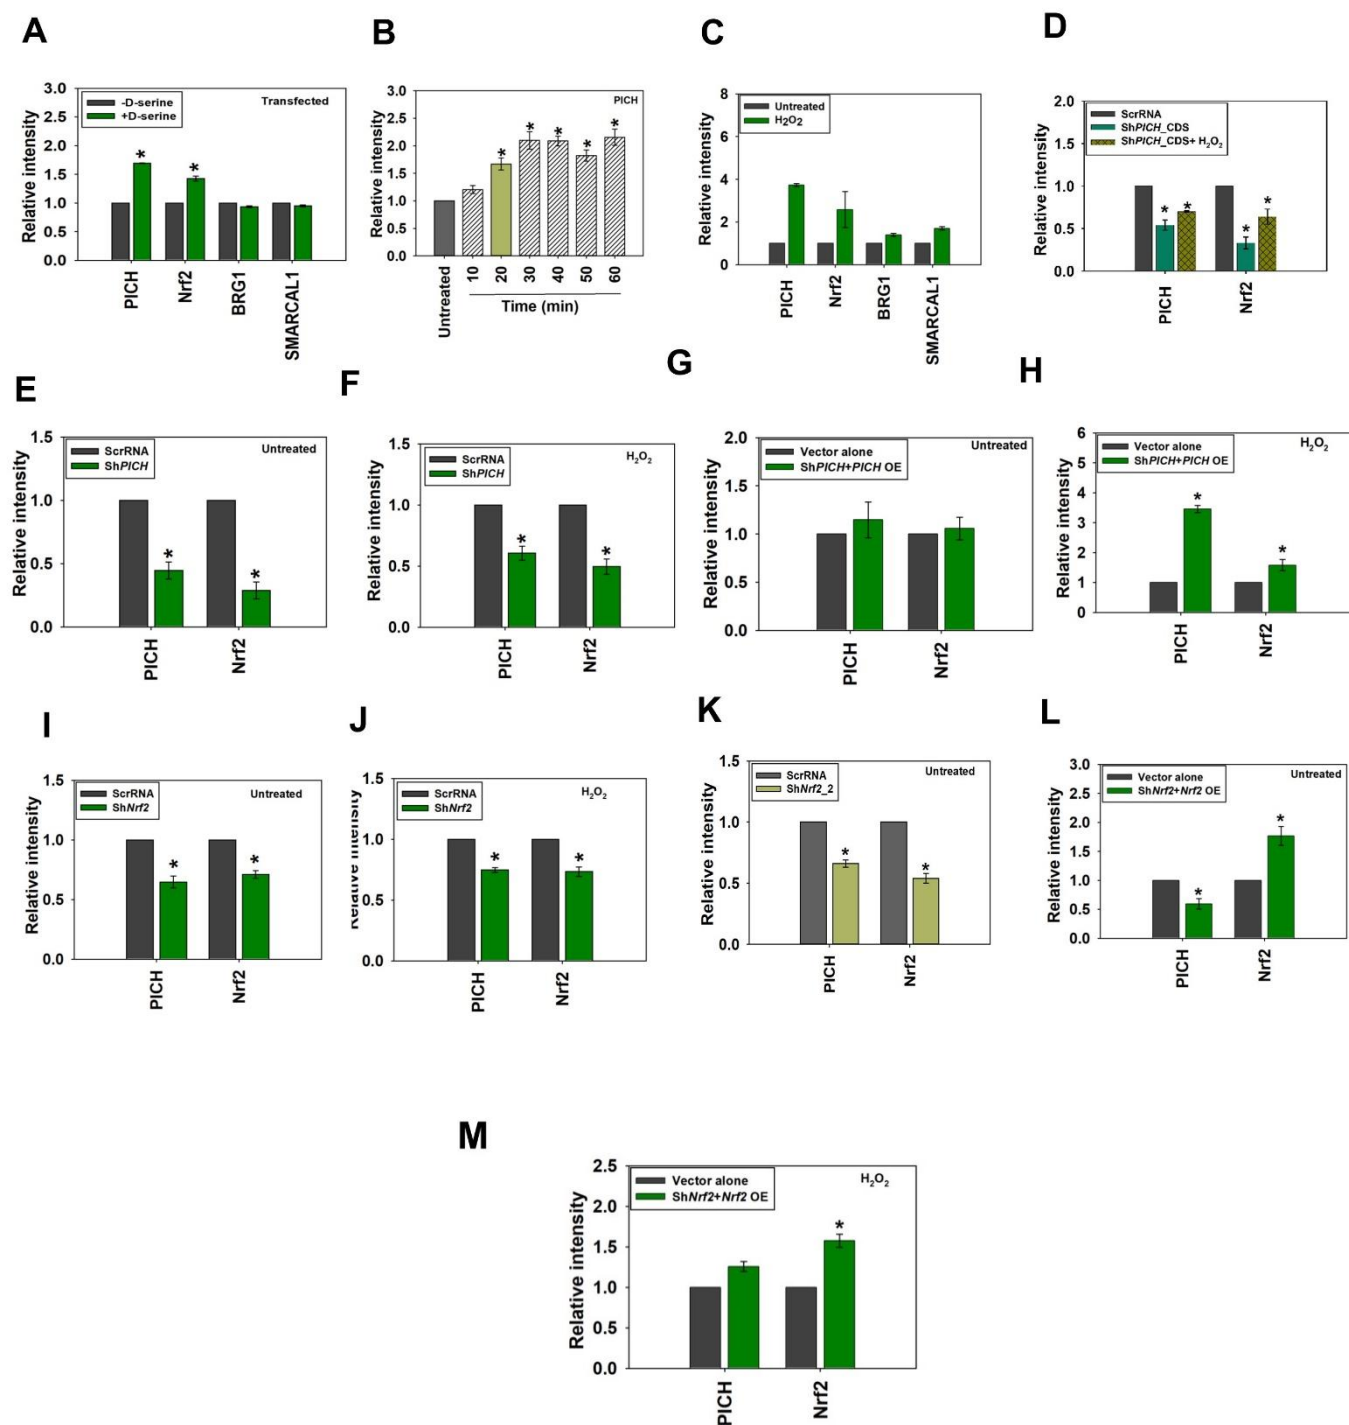

**Supplementary Figure S6. Quantification of all western blots.** The western blots are presented as average  $\pm$  SEM of two independent experiments. The intensities were quantitated using Image J software. The intensities of the proteins were normalized with respect to H3 and are represented as Relative Intensity on the y-axis.



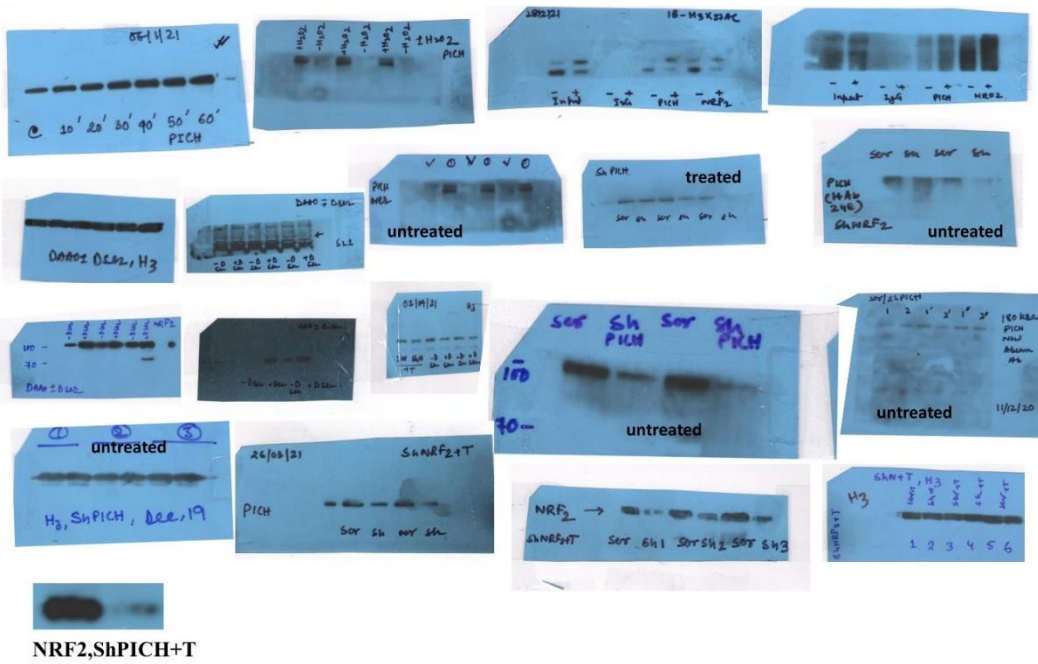

NRF2,ShPICH+T

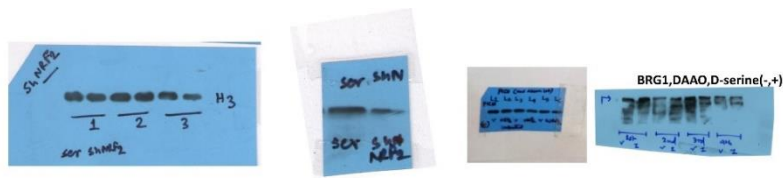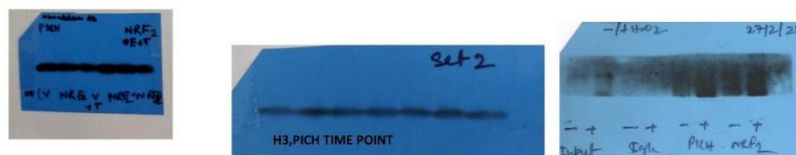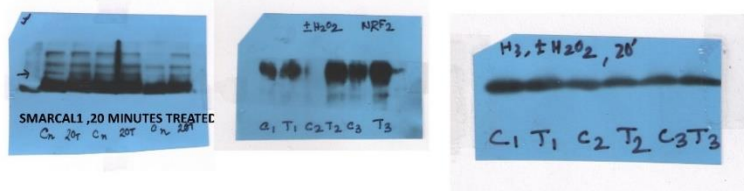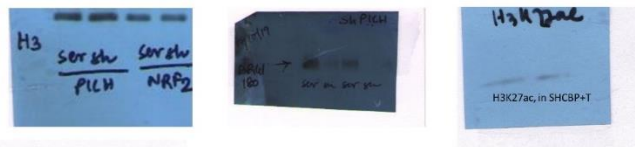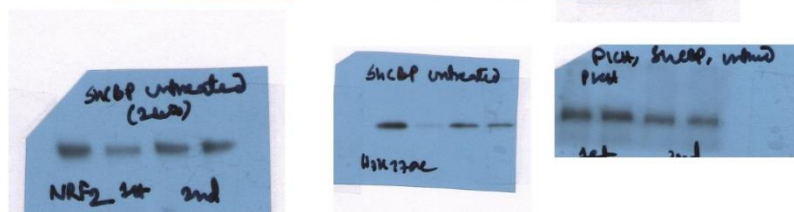

Nrf2, in Sh PI3K\_2

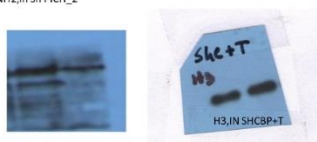

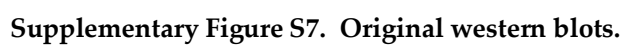



**Supplementary Table S1: List of primers used in qRT-PCR experiments.**

| Gene name      | Forward primer<br>(5' 3') | Reverse primer<br>(5' 3') |
|----------------|---------------------------|---------------------------|
| <i>PICH</i>    | GGTAACTGGAACCCAATCCGAGG   | TCTTTCACATATCTTAGGTAATG   |
| <i>NRF2</i>    | GCGACGGAAAGAGTATGAGC      | GTTGGCAGATCCACTGGTTT      |
| <i>BRG1</i>    | CGTGGAGGAGAAGAAGAAGA      | CTGTTTGAGGACACCATTTGA     |
| <i>SMARCA1</i> | GAAGTGGAGCTTTCTCTTGG      | CAGATTAGACACGAGCTTGG      |
| <i>CAT</i>     | AGCTTAGCGTTCATCCGTGT      | TCCAATCATCCGTCAAAACA      |
| <i>GPX1</i>    | CTCTTCGAGAAGTGCGAGGT      | TCGATGTCAATGGTCTGGAA      |
| <i>GSR</i>     | AGTGGGACTCACGGAAGATG      | TTCAGTGCAACAGCAAAACC      |
| <i>TXNRD1</i>  | CTAAAAATGAACGGCCCTGA      | ACACATGTTCTCCGAGACC       |
| <i>SOD1</i>    | AGGGCATCATCAATTTTCGAG     | ACATTGCCCAAGTCTCCAAC      |
| <i>GAPDH</i>   | GGTCGGAGTCAACGGATTTGGTC   | GAGGGATCTCGCTCCTGGAAG     |
| <i>DNA-PKc</i> | GCCAGAGAAGCAGCAAATGG      | TCTCCGAAAACGACCAGTGG      |

**Supplementary Table S2: List of primers used in ChIP experiments.**

| Gene name             | Forward primer<br>(5' 3') | Reverse primer<br>(5' 3') |
|-----------------------|---------------------------|---------------------------|
| <i>PICH</i> Pair 1    | AGCGGTCCAGACATACCTTA      | GAGCGAAATTCAAGCTCCAAAC    |
| <i>PICH</i> Pair 2    | GTGATCTCTGCCTTCGAGAC      | CCGCAATGACTGGGATCATA      |
| <i>Nrf2</i> Pair 1    | ACTCGGTAATCGGCTACA        | CGAGCTTCTTGCGTCAG         |
| <i>Nrf2</i> Pair2     | GCTGACGCAAGAAGCTC         | CCTTCGAAACAACCTTTTATC     |
| <i>GPX1</i> Pair 1    | AAACTGGTTGCACGGGAAG       | TGTGTGCTGCTCGGCTA         |
| <i>GPX1</i> Pair 2    | CATGGCGCAATTGTCCAAGAA     | TCCTTCCGGCTTAGGAGGAG      |
| <i>TXNRD1</i> Pair 1  | GCACGAGGAGTGGATTTT        | TGAGAATGATGAAGACATCAGG    |
| <i>TXNRD1</i> Pair 2  | GAGTTCTGTAGCTACTGCCTTA    | AAAGCAGAAATCCACTCCTC      |
| <i>SOD1</i> Pair 1    | GGGTCTGGACGTTTCC          | CGACTACTTTATAGGCCAGAC     |
| <i>SOD1</i> Pair 2    | CGGAGGTCTGGCCTATAA        | CTTCTGCTCGAAATTGATGATG    |
| <i>DNA-PKc</i> Pair 1 | AACTCTTGACCTAGGCCCCT      | CAGTAAGCGCGCCTCTTTG       |
| <i>GAPDH</i> Pair 1   | AAAAGCGGGGAGAAAGTAGG      | AAAAGCGGGGAGAAAGTAGG      |

**Supplementary Table S3: Oligonucleotides used in PICH-DNA interaction studies. The ARE sequence is highlighted in Red color. Bold and underlined residue shows the changes made with respect to GPX1 ARE.**

| Oligonucleotide                  | Forward sequence<br>(5' 3')                | Reverse sequence<br>(5' 3')                | Mfold<br>( G kcal/mol) | G-<br>Quadruplex(G-<br>score) |
|----------------------------------|--------------------------------------------|--------------------------------------------|------------------------|-------------------------------|
| <b>Stem-loop DNA<br/>(slDNA)</b> | GCGCAATTGCGCTCGACGATTTT<br>TTAGCGCAATTGCGC |                                            | -16.3                  | 0                             |
| dsDNA                            | GCGCAATTGCGC                               | CGCGTTAACGCG                               | -4.15                  | 0                             |
| PICH                             | ACCCAATCCGAGGGTCATGGAGG<br>CATCCCGAAGGTTTC | GAAACCTTCGGGATGCCTCCATGACCCTC<br>GGATTGGGT | -3.18                  | 13                            |
| Nrf2                             | GACCGCGAGCTTCTTGCGTCAGC<br>CCCGGCGCGGGTGGG | CCCACCCGCGCCGGGGCTGACGCAAGAA<br>GCTCGCGGTC | -6.41                  | 0                             |
| SOD1                             | CCAGGACCTCGGCGTGGCCTAGC<br>GAGTTATGGCGACGA | TCGTCGCCATAACTCGCTAGGCCACGCCG<br>AGGTCCTGG | -5.50                  | 11                            |
| GPX1                             | TGTGGCGTCCCTCTGAGGCACCA<br>CGGTCCGGGACTACA | TGTAGTCCCGGACCGTGGTGCCTCAGAGG<br>GACGCCACA | -2.88                  | 14                            |
| TXNRD1                           | TTCTCGTAGCCATTAGGAAACAG<br>CAACCCTTTCACCTC | GAGGTGAAAGGGTTGCTGTTTCCTAATGG<br>CTACGAGAA | -0.98                  | 0                             |

**Supplementary Table S4: List of target sequences used in making ShRNA constructs.**

| Constructs         | Target sequences<br>(5' 3') |
|--------------------|-----------------------------|
| Sh <i>PICH</i>     | TATTCTGAGCACTAGCTTAAT       |
| Sh <i>Nrf2</i>     | GCTCCTACTGTGATGTGAAAT       |
| Sh <i>Nrf2_2</i>   | GGAGTGTCAGTATGTTGAATC       |
| Sh <i>PICH_CDS</i> | GCTGCTCATTACCTAAGATAT       |
